# Supplementary material for: Next-Day Serum Glial Fibrillary Acidic Protein Levels to Aid Diagnosis of Sport-Related Concussion
Source: bioRxiv or medRxiv preprint supplement (doi:10.1101/2024.07.31.24310616), 2024-08-01
Supplement: Supplementary file [file media-1.pdf]

**Supplementary Table 1:** Recruitment group and timing for individuals that participated two or three times.

| <b>Participant</b> | <b>Sample #1</b> | <b>Sample #2</b> | <b>Sample #3</b> |
|--------------------|------------------|------------------|------------------|
| 1                  | SRC (2021)       | MSK (2022)       |                  |
| 2                  | SRC (2021)       | SRC (2023)       |                  |
| 3                  | MSK (2021)       | SRC (2024)       |                  |
| 4                  | MSK (2021)       | HC (2022)        |                  |
| 5                  | SRC (2021)       | SRC (2024)       |                  |
| 6                  | SRC (2021)       | HC (2022)        |                  |
| 7                  | HC (2022)        | SRC (2022)       |                  |
| 8                  | HC (2022)        | SRC (2023)       |                  |
| 9                  | HC (2022)        | SRC (2022)       |                  |
| 10                 | HC (2022)        | HC (2023)        | SRC (2024)       |
| 11                 | SRC (2022)       | SRC (2022)       |                  |
| 12                 | SRC (2022)       | SRC (2024)       |                  |
| 13                 | SRC (2022)       | HC (2023)        | SRC (2023)       |
| 14                 | HC (2023)        | SRC (2024)       | SRC (2024)       |
| 15                 | HC (2023)        | SRC (2024)       |                  |
| 16                 | SRC (2023)       | SRC (2024)       |                  |
| 17                 | HC (2023)        | SRC (2024)       |                  |
| 18                 | SRC (2023)       | SRC (2024)       |                  |
| 19                 | HC (2023)        | SRC (2024)       |                  |

(year) denotes the recruitment year.

Abbreviations: SRC, sport-related concussion; MSK, musculoskeletal; HC, healthy control

**Supplementary Table 2:** Study participants that self-reported sustaining a concussion in the six months prior to recruitment.

| <b>Participant</b> | <b>Group</b> | <b>Time since previous concussion<br/>(self-reported; days)</b> |
|--------------------|--------------|-----------------------------------------------------------------|
| 1                  | SRC          | 29                                                              |
| 2                  | SRC          | 9                                                               |
| 3                  | SRC          | 29                                                              |
| 4                  | HC           | 112                                                             |
| 5                  | SRC          | 50                                                              |
| 6                  | SRC          | 84                                                              |

Abbreviations: SRC, sport-related concussion; HC, healthy control.

**Supplementary Table 3:** Area under the curve statistics for serum GFAP and SCAT symptom severity for supplementary analyses.

| Time Window            |             | SRC Sample Size | GFAP Raw            | GFAP Adjusted       | SCAT Symptoms       | SCAT Symptoms + GFAP (Raw) |
|------------------------|-------------|-----------------|---------------------|---------------------|---------------------|----------------------------|
| Next or Subsequent Day | <i>i)</i>   | 156             | 0.74<br>(0.68-0.80) | 0.74<br>(0.68-0.80) | 0.93<br>(0.89-0.96) | 0.95<br>(0.93-0.98)        |
|                        | <i>ii)</i>  | 151             | 0.73<br>(0.67-0.79) | 0.74<br>(0.67-0.80) | 0.92<br>(0.89-0.96) | 0.95<br>(0.93-0.98)        |
|                        | <i>iii)</i> | 139             | 0.73<br>(0.67-0.80) | 0.74<br>(0.68-0.80) | 0.93<br>(0.90-0.97) | 0.96<br>(0.94-0.99)        |
| Next Day               | <i>i)</i>   | 131             | 0.78<br>(0.72-0.84) | 0.78<br>(0.73-0.84) | 0.93<br>(0.90-0.96) | 0.96<br>(0.94-0.98)        |
|                        | <i>ii)</i>  | 127             | 0.77<br>(0.71-0.83) | 0.78<br>(0.72-0.84) | 0.93<br>(0.89-0.96) | 0.96<br>(0.93-0.98)        |
|                        | <i>iii)</i> | 115             | 0.78<br>(0.72-0.84) | 0.79<br>(0.73-0.85) | 0.94<br>(0.91-0.97) | 0.96<br>(0.94-0.99)        |
| 16-24 hours            | <i>i)</i>   | 63              | 0.83<br>(0.76-0.90) | 0.83<br>(0.76-0.90) | 0.92<br>(0.87-0.97) | 0.98<br>(0.95-1.00)        |
|                        | <i>ii)</i>  | 60              | 0.83<br>(0.76-0.90) | 0.83<br>(0.76-0.90) | 0.91<br>(0.86-0.97) | 0.97<br>(0.95-1.00)        |
|                        | <i>iii)</i> | 50              | 0.83<br>(0.75-0.91) | 0.83<br>(0.75-0.91) | 0.94<br>(0.90-0.99) | 0.99<br>(0.97-1.00)        |
| 24-32 hours            | <i>i)</i>   | 68              | 0.72<br>(0.64-0.81) | 0.76<br>(0.68-0.83) | 0.93<br>(0.89-0.97) | 0.95<br>(0.91-0.98)        |
|                        | <i>ii)</i>  | 67              | 0.72<br>(0.64-0.80) | 0.75<br>(0.68-0.83) | 0.93<br>(0.89-0.97) | 0.94<br>(0.91-0.98)        |
|                        | <i>iii)</i> | 65              | 0.74<br>(0.65-0.82) | 0.76<br>(0.69-0.84) | 0.93<br>(0.89-0.97) | 0.94<br>(0.90-0.98)        |
| 36-52 hours            | <i>i)</i>   | 25              | 0.48<br>(0.33-0.62) | 0.50<br>(0.35-0.66) | 0.92<br>(0.86-0.99) | 0.93<br>(0.87-1.00)        |
|                        | <i>ii)</i>  | 24              | 0.48<br>(0.33-0.64) | 0.52<br>(0.36-0.68) | 0.92<br>(0.85-0.99) | 0.93<br>(0.87-1.00)        |
|                        | <i>iii)</i> | 24              | 0.48<br>(0.33-0.63) | 0.50<br>(0.34-0.66) | 0.92<br>(0.85-0.99) | 0.93<br>(0.87-1.00)        |

Next day defined as 16-32h, subsequent day 36-52h. Data presented as AUC (95% CI). Adjusted indicates GFAP AUC adjusted for age and BMI. *i)* denotes AUC analysis for all data. *ii)* denotes analysis with exclusion of study participants that self-reported sustaining a concussion in the 6 months prior to recruitment. *iii)* denotes analysis with the exclusion of the second (and third) participation of an individual. Five control participants and 1 SRC participant had no SCAT symptom data and were not included in associated AUC calculations.

Abbreviations: SRC, sport-related concussion; GFAP, glial fibrillary acidic protein; SCAT, sport concussion assessment tool. AUC, area under curve; 95% CI, 95% confidence interval; BMI, body mass index.

**Supplementary Table 4:** Distribution of GFAP levels for supplementary analyses.

|                                         | Sample size | GFAP Median (IQR)          | Sample size | GFAP Median (IQR)        |
|-----------------------------------------|-------------|----------------------------|-------------|--------------------------|
|                                         | SRC         |                            | Control     |                          |
| All data                                | 156         | 100.07<br>(63.32 – 169.22) | 98          | 66.00<br>(49.46 – 81.23) |
| Concussion in prior six months excluded | 151         | 100.00<br>(62.83 – 166.39) | 97          | 65.87<br>(49.12 – 81.30) |
| Repeated participation excluded         | 139         | 98.81<br>(62.83 – 160.99)  | 93          | 66.14<br>(48.03 – 81.05) |
|                                         | MSK         |                            | HC          |                          |
| MSK vs HC                               | 14          | 70.48<br>(49.88 – 79.87)   | 84          | 64.84<br>(50.15 - 81.93) |

Abbreviations: SRC, sport-related concussion; GFAP, glial fibrillary acidic protein; MSK, musculoskeletal injury; HC, healthy control; IQR, interquartile range.
